# Supplementary material for: A multiplatform metabolomics approach for comprehensive analysis of GIST xenografts with various KIT mutations
Source: Royal Society of Chemistry journal article supplement (doi:10.1039/d3an00599b), 2023-01-01
Supplement: d3an00599b1.pdf [file d3an00599b1.pdf]

Electronic supplementary information (ESI) for:

## **Multiplatform metabolomics approach for comprehensive analysis of GIST xenografts with various *KIT* mutations**

Szymon Macioszek,<sup>a</sup> Danuta Dudzik,<sup>a</sup> Margot Biesemans<sup>a</sup>, Agnieszka Wozniak<sup>b</sup>, Patrick Schoffski<sup>b</sup>, and Michal J. Markuszewski<sup>a</sup>

<sup>a</sup> Department of Biopharmaceutics and Pharmacodynamics, Medical University of Gdańsk, Hallera 107, 80-416 Gdańsk, Poland. E-mail: [michal.markuszewski@gumed.edu.pl](mailto:michal.markuszewski@gumed.edu.pl) ; Tel.: +48-58-349-1493

<sup>b</sup> Laboratory of Experimental Oncology, Department of Oncology, KU Leuven, and Department of General Medical Oncology, University Hospitals Leuven, Leuven Cancer Institute, Leuven, Belgium.

## GC-MS parameters

Table S1. GC-MS parameters of the applied method.

| Parameter                          | Value             |
|------------------------------------|-------------------|
| Injector temperature               | 250 °C            |
| Detector transfer line temperature | 320 °C            |
| Filament source temperature        | 230 °C            |
| Quadrupole temperature             | 150 °C            |
| Electron impact voltage            | 70 eV             |
| Operation mode                     | scan              |
| Scan speed                         | 2 spectra/s       |
| Mass range                         | 50–600 <i>m/z</i> |

## LC-MS parameters

The detailed gradient programs for LC-MS analyses in RP and HILIC modes are presented in Table S2. MS parameters during LC-MS runs are presented in Table S3. The mass range for the detection of metabolic features was 61-1200 *m/z* in both RP and HILIC analyses.

Table S2. Gradient elution conditions during LC-MS analyses in RP and HILIC modes.

| RP-LC-MS   |                    |                    | HILIC-LC-MS |                    |                    |
|------------|--------------------|--------------------|-------------|--------------------|--------------------|
| Time [min] | Mobile phase A [%] | Mobile phase B [%] | Time [min]  | Mobile phase A [%] | Mobile phase B [%] |
| 0.0        | 18.0               | 82.0               | 0.0         | 5.0                | 95.0               |
| 30.0       | 4.0                | 96.0               | 22.0        | 45.0               | 55.0               |
| 38.0       | 4.0                | 96.0               | 23.0        | 45.0               | 55.0               |
| 38.5       | 0.0                | 100.0              | 23.5        | 5.0                | 95.0               |
| 40.5       | 0.0                | 100.0              | 29.0        | 5.0                | 95.0               |
| 42.0       | 18.0               | 82.0               |             |                    |                    |
| 50.0       | 18.0               | 82.0               |             |                    |                    |

Table S3. Mass spectrometry parameters during LC-MS analyses.

| Parameter          | RP       | HILIC    |
|--------------------|----------|----------|
| Gas temperature    | 350 °C   | 350 °C   |
| Gas flow           | 10 L/min | 11 L/min |
| Nebulizer pressure | 45 psi   | 45 psi   |
| Fragmentor voltage | 175 V    | 150 V    |
| Skimmer voltage    | 65 V     | 65 V     |

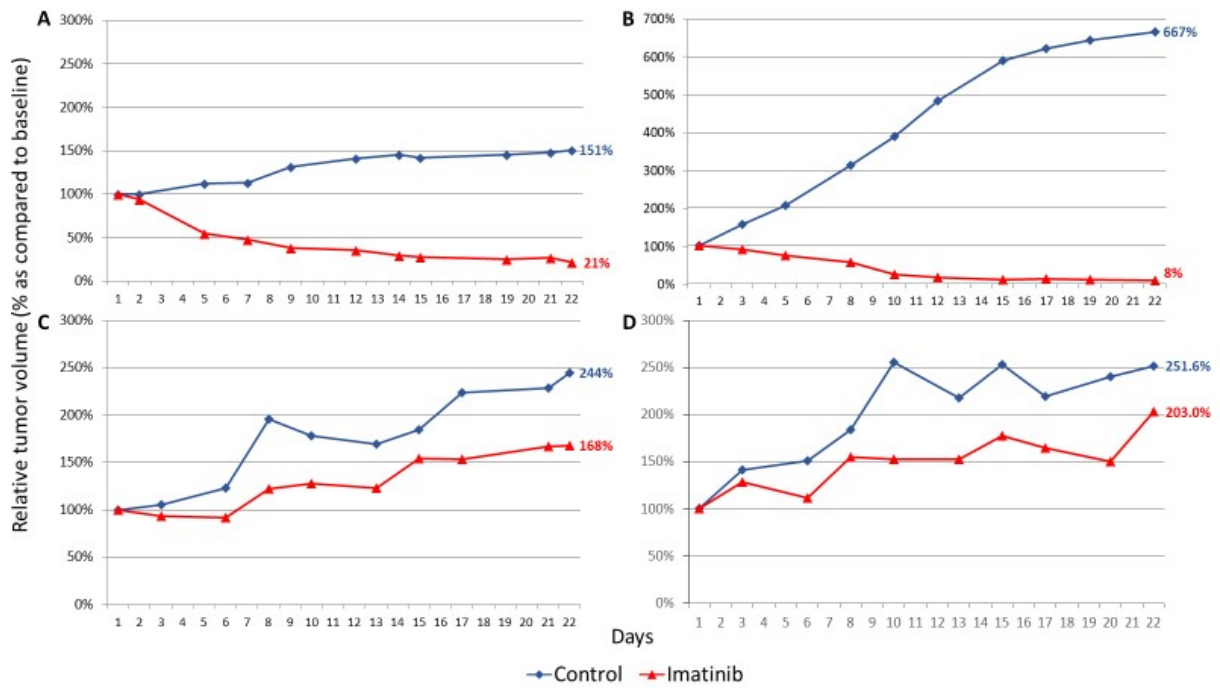

Figure S1. Relative tumour volume evolution comparing the untreated controls with imatinib twice a day orally at 50 mg/kg in UZLX-GIST1 (A)<sup>43</sup>, UZLX-GIST4 (B)<sup>44</sup>, UZLX-GIST2 (C)<sup>43</sup> and UZLX-GIST9 (D)<sup>45</sup> patient-derived xenograft models.

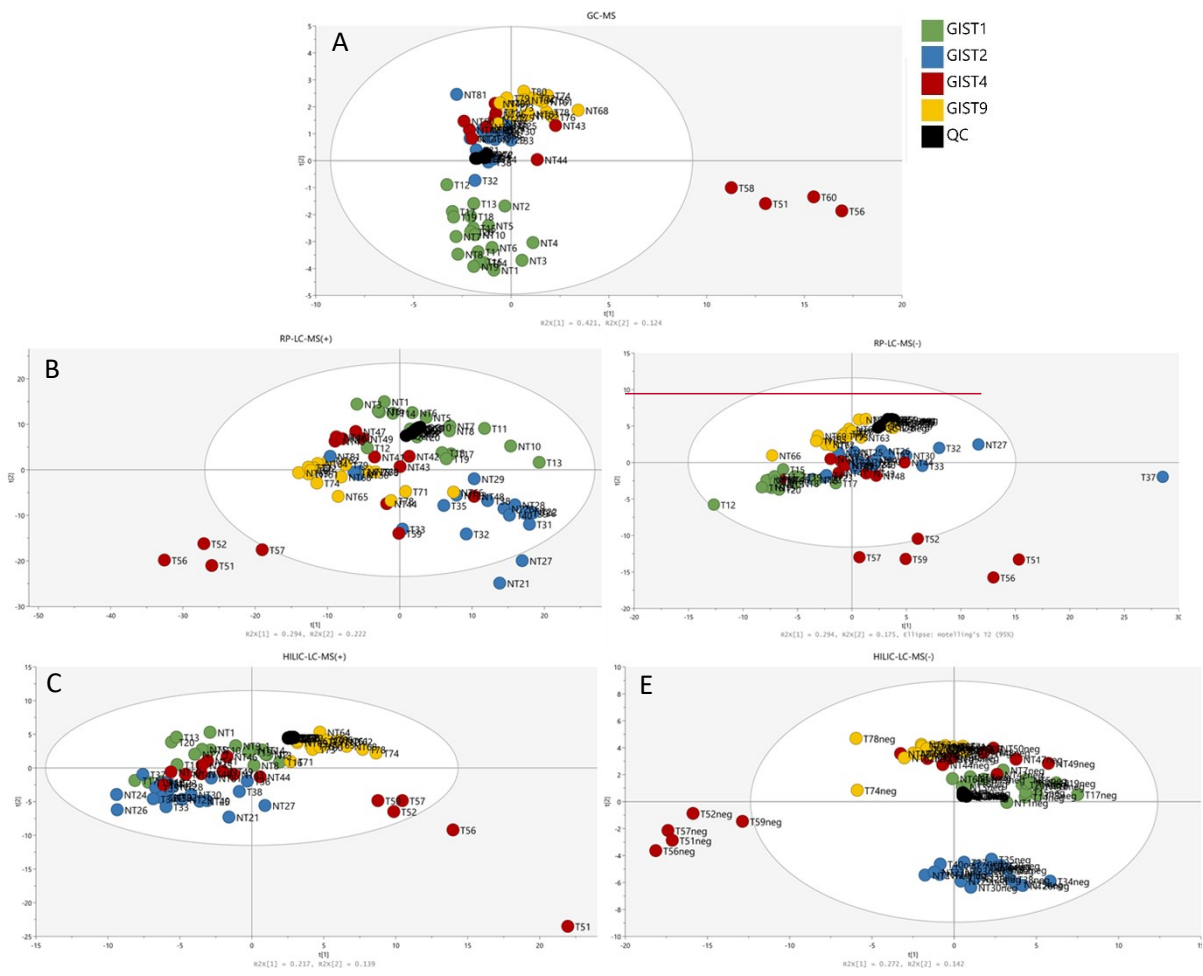

Figure S2. PCA score plots for data obtained from GIST extracts GC-MS (A) analysis . RP-LC-TOF-MS analysis in positive (B) and negative (C) ionization modes. and HILIC-LC-TOF-MS analysis in positive (D) and negative (E) ionization modes. Black colour corresponds to quality control samples.

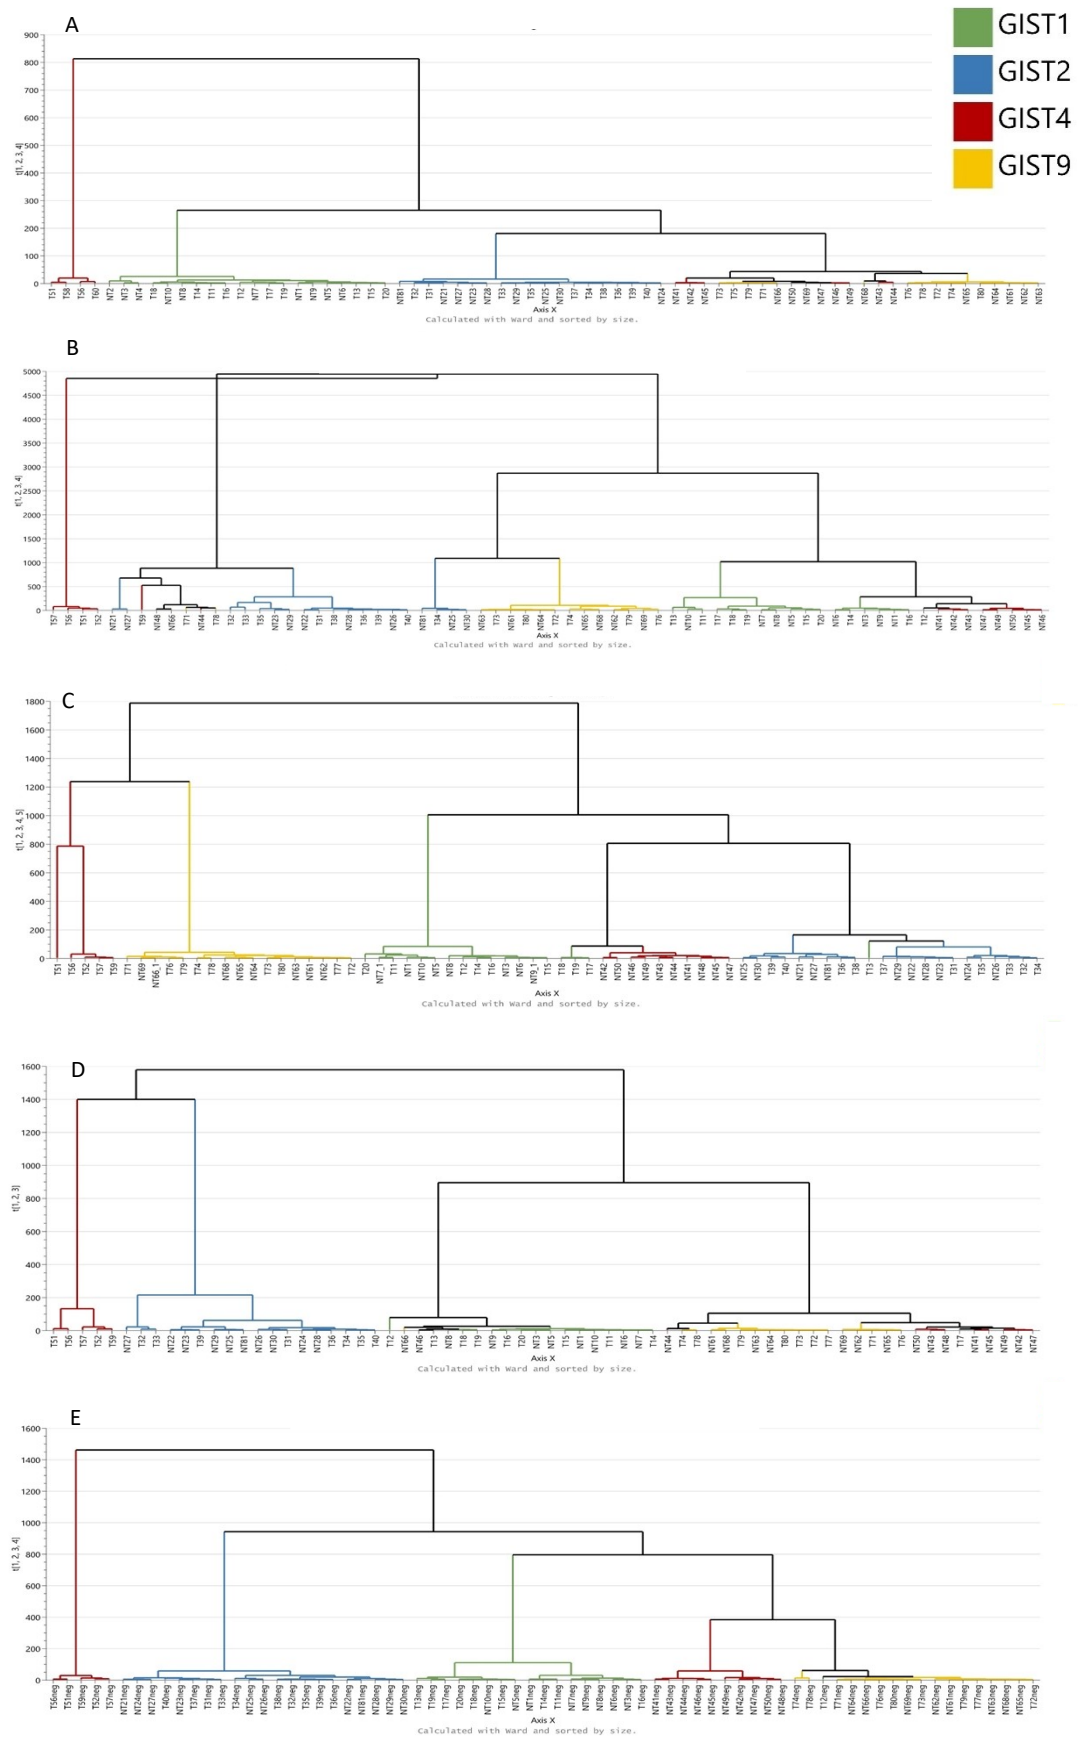

Figure S3. Representation of hierarchical cluster analysis of GIST samples analysed by GC-MS (A) analysis . RP-LC-TOF-MS analysis in positive (B) and negative (C) ionization modes. and HILIC-LC-TOF-MS analysis in positive (D) and negative (E) ionization modes. Imatinib-treated samples from GIST4 model are substantially distinct from the remaining samples.

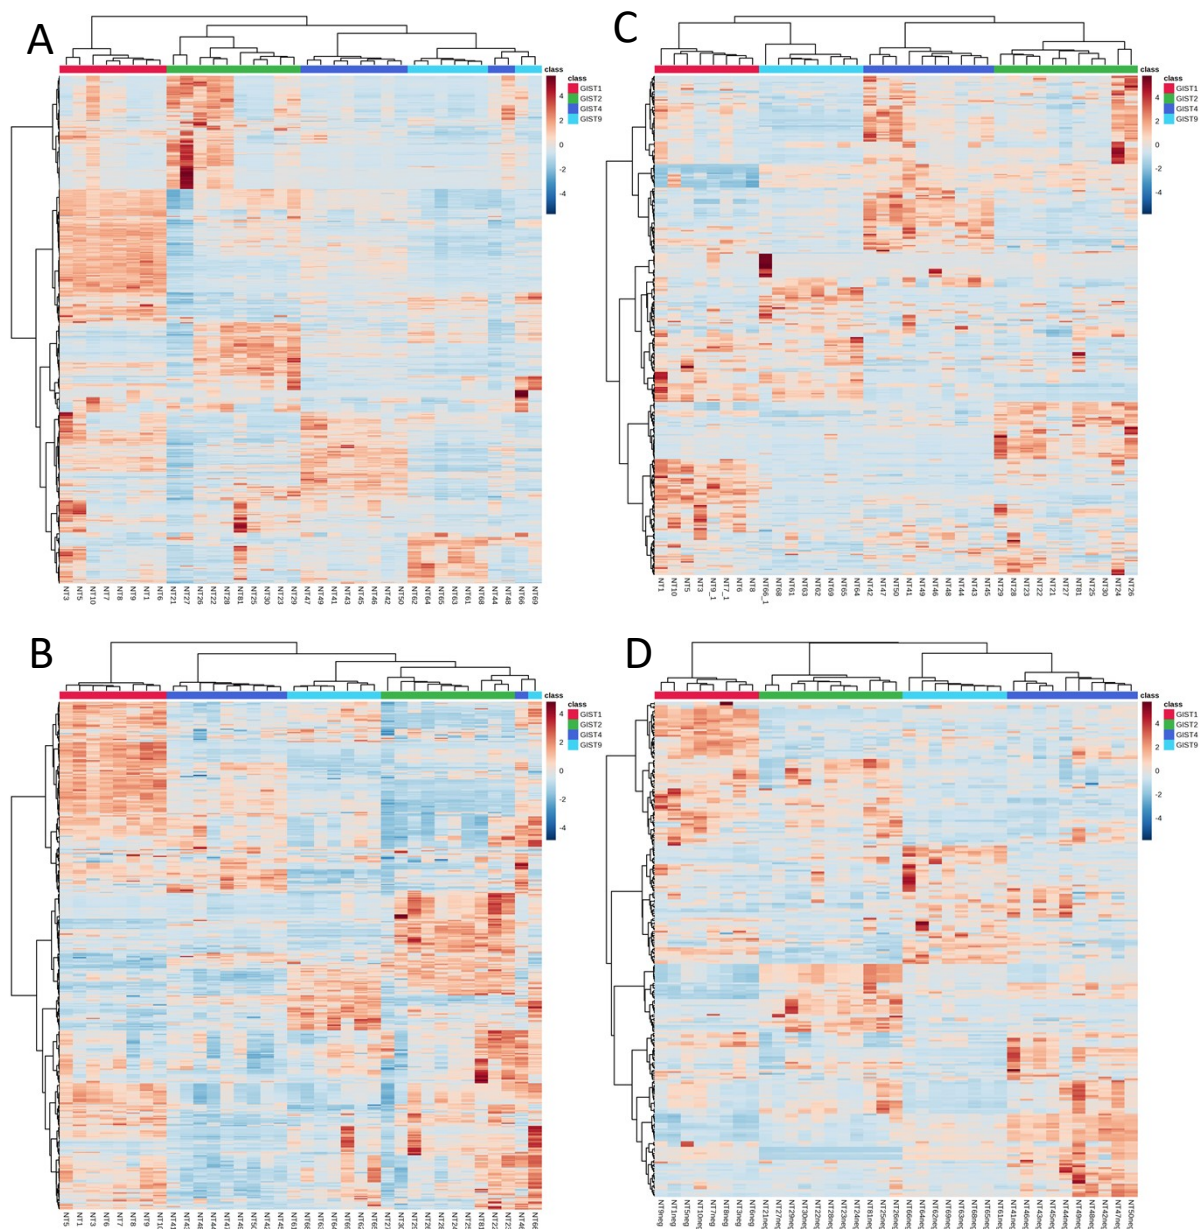

Figure S4. Heatmaps of the signal intensity of metabolic features detected by RP-LC-TOF-MS analysis in positive (A) and negative (B) ionization modes, and HILIC-LC-TOF-MS analysis in positive (C) and negative (D) ionization modes.

Table S4. Statistically significant metabolites (with 5 lowest FDR values from each analytical technique) differentiating four GIST models used in the study. *p* and FDR values result from ANOVA test. Tukey's test indicates between which groups statistical significance was confirmed.

| Metabolite                   | <i>p</i> value | FDR      | Tukey's test                                                    | Technique      |
|------------------------------|----------------|----------|-----------------------------------------------------------------|----------------|
| <b>SM(18:0/16:1)</b>         | 1.40E-23       | 3.52E-21 | GIST2-GIST1; GIST4-GIST1; GIST9-GIST1; GIST4-GIST2; GIST9-GIST4 | RP-LC-MS(+)    |
| <b>PE(18:0/16:1)</b>         | 3.10E-19       | 1.74E-17 | GIST2-GIST1; GIST4-GIST1; GIST9-GIST1; GIST4-GIST2; GIST9-GIST4 | RP-LC-MS(+)    |
| <b>PC(10:0/20:0)</b>         | 3.24E-18       | 1.21E-16 | GIST2-GIST1; GIST4-GIST1; GIST9-GIST1; GIST4-GIST2; GIST9-GIST2 | RP-LC-MS(+)    |
| <b>PE(16:1/22:2)</b>         | 2.50E-14       | 3.89E-13 | GIST2-GIST1; GIST4-GIST1; GIST9-GIST1; GIST4-GIST2; GIST9-GIST4 | RP-LC-MS(+)    |
| <b>SM(18:1/22:0)</b>         | 2.08E-13       | 2.50E-12 | GIST2-GIST1; GIST9-GIST1; GIST4-GIST2; GIST9-GIST4              | RP-LC-MS(+)    |
| <b>PE(16:0/18:2)</b>         | 8.69E-18       | 1.31E-15 | GIST2-GIST1; GIST4-GIST1; GIST9-GIST1; GIST4-GIST2; GIST9-GIST4 | RP-LC-MS(-)    |
| <b>PE(18:0/20:5)</b>         | 2.01E-15       | 4.54E-14 | GIST2-GIST1; GIST4-GIST1; GIST9-GIST1                           | RP-LC-MS(-)    |
| <b>PC(14:0/18:1)</b>         | 6.64E-15       | 1.25E-13 | GIST2-GIST1; GIST4-GIST1; GIST9-GIST1; GIST4-GIST2; GIST9-GIST2 | RP-LC-MS(-)    |
| <b>PE(18:0/22:4)</b>         | 4.69E-14       | 6.04E-13 | GIST2-GIST1; GIST9-GIST1; GIST4-GIST2; GIST9-GIST2              | RP-LC-MS(-)    |
| <b>PE(16:1/22:2)</b>         | 6.42E-13       | 6.16E-12 | GIST2-GIST1; GIST4-GIST1; GIST9-GIST1; GIST4-GIST2; GIST9-GIST2 | RP-LC-MS(-)    |
| <b>2-Methylnicotinamide</b>  | 6.66E-20       | 8.90E-18 | GIST9-GIST1; GIST9-GIST2; GIST9-GIST4                           | HILIC-LC-MS(+) |
| <b>PC(14:0/18:1)</b>         | 5.77E-17       | 3.31E-15 | GIST2-GIST1; GIST4-GIST1; GIST9-GIST1                           | HILIC-LC-MS(+) |
| <b>Adenosine</b>             | 6.23E-09       | 4.16E-08 | GIST4-GIST1; GIST4-GIST2; GIST9-GIST2                           | HILIC-LC-MS(+) |
| <b>PC(18:1/0:0)</b>          | 2.72E-08       | 1.49E-07 | GIST2-GIST1; GIST4-GIST2; GIST9-GIST2                           | HILIC-LC-MS(+) |
| <b>Hypoxanthine</b>          | 3.20E-08       | 1.67E-07 | GIST4-GIST1; GIST4-GIST2; GIST9-GIST4                           | HILIC-LC-MS(+) |
| <b>Uridine/Pseudouridine</b> | 1.56E-16       | 4.63E-15 | GIST4-GIST1; GIST9-GIST1; GIST4-GIST2; GIST9-GIST2; GIST9-GIST4 | HILIC-LC-MS(-) |
| <b>Guanosine</b>             | 6.94E-16       | 1.55E-14 | GIST4-GIST1; GIST9-GIST1; GIST4-GIST2; GIST9-GIST2; GIST9-GIST4 | HILIC-LC-MS(-) |
| <b>Taurine</b>               | 6.55E-09       | 3.44E-08 | GIST2-GIST1; GIST4-GIST2; GIST9-GIST2                           | HILIC-LC-MS(-) |
| <b>Oxoglutaric acid</b>      | 2.64E-05       | 5.76E-05 | GIST2-GIST1; GIST9-GIST1                                        | HILIC-LC-MS(-) |
| <b>Myo-Inositol</b>          | 5.81E-12       | 2.60E-10 | GIST4-GIST1; GIST9-GIST1; GIST4-GIST2; GIST9-GIST2; GIST9-GIST4 | GC-MS          |
| <b>Uridine</b>               | 7.97E-12       | 2.60E-10 | GIST4-GIST1; GIST9-GIST1; GIST4-GIST2; GIST9-GIST2              | GC-MS          |
| <b>L-Glutamic acid</b>       | 7.31E-08       | 7.17E-07 | GIST9-GIST1; GIST9-GIST2; GIST9-GIST4                           | GC-MS          |
| <b>L-Threonine</b>           | 9.66E-08       | 8.60E-07 | GIST2-GIST1; GIST4-GIST1; GIST9-GIST1                           | GC-MS          |
| <b>L-Alanine</b>             | 3.40E-07       | 2.56E-06 | GIST2-GIST1; GIST4-GIST1; GIST9-GIST1                           | GC-MS          |

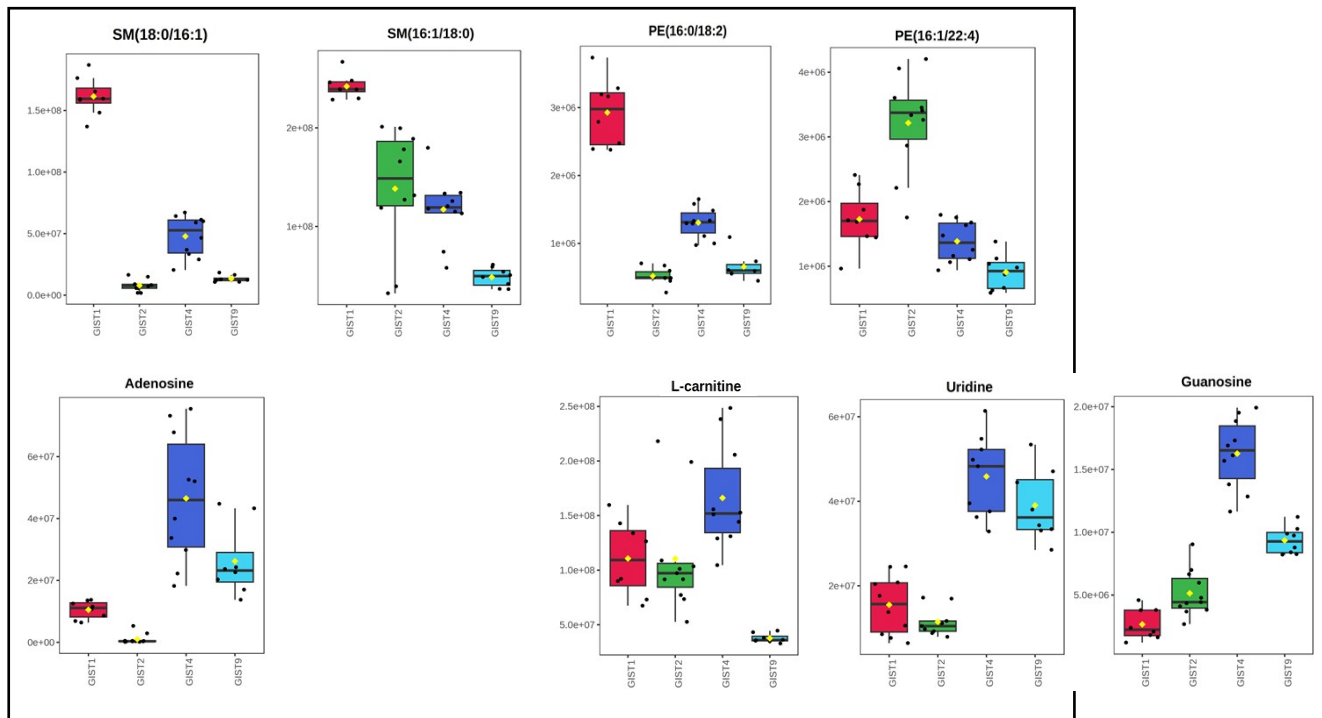

Figure S5. Box plots visualising the differences in metabolite signal intensity between four GIST models. Representative metabolites have been selected from Table S4 (generated in MetaboAnalyst 5.0).
