# Supplementary material for: A multiplatform metabolomics approach for comprehensive analysis of GIST xenografts with various KIT mutations
Source: Royal Society of Chemistry journal article supplement (doi:10.1039/d3an00599b), 2023-01-01
Supplement: d3an00599b2.zip [file d3an00599b2.zip]

## Sheet: Arkusz2
Tables presenting metbolites detected in each of the applied analytical technique (GC-MS, RP-LC-MS(+), RP-LC-MS(-), HILIC-LC-MS(+), HILIC-LC-MS(-)), which were significant in comparisons between imatinib-treated GISTs and non-treated controls.
GC-MS							RP-LC-MS(+)							RP-LC-MS(-)							HILIC-LC-MS(+)						HILIC-LC-MS(-)
Compound ID	Compound Class	Significant percentage change					Compound ID	Compound Class	Significant percentage change					Compound ID	Compound Class	Significant percentage change					Compound ID	Compound Class	Significant percentage change				Compound ID	Compound Class	Significant percentage change
		GIST 1 T vs. NT	GIST 2 T vs. NT	GIST 4 T vs. NT	GIST9 Tvs NT				GIST 1 T vs. NT	GIST 2 T vs. NT	GIST 4 T vs. NT	GIST9 Tvs NT				GIST 1 T vs. NT	GIST 2 T vs. NT	GIST 4 T vs. NT	GIST9 Tvs NT				GIST 2 T vs. NT	GIST 4 T vs. NT	GIST9 Tvs NT				GIST 2 T vs. NT	GIST 4 T vs. NT
trans-4-hydroxy-L-proline	Amino acids and derivatives	74.8069		-88.2149			PE(P-20:0/22:6)	PE	-47.8841		-74.4762			PE(20:3/14:1)	PE	-34.5898					3-hydroxyoctanoyl carnitine	Acylcarnitines	-54.4936		-26.8088		Uridine/Pseudouridine	Pyrimidine nucleosides	-42.0723
Aminomalonic acid	Amino acids and derivatives	59.8121		-85.7488			2-oxo-heneicosanoic acid	Fatty acyls	-49.6597		-85.9385			PE(16:1/20:5)	PE	-47.6414	-76.1581				Adenine	Purines and purine derivatives	51.3089	-82.0706			Dehydroascorbic acid	Lactones	85.27
Putrescine	Amines	-76.9478					PC(17:0/12:0)	PC	-36.6611					SM(d18:1/15:0)	SM	79.7321					PC(16:1/0:0)	PC	-52.1729				Xanthine	Purines and purine derivatives	-50.1459
5-aminovaleric acid	Amino acids and derivatives	65.0047					PE(O-20:0/20:3)	PE	-39.4425		-82.7397			PE(18:0/14:1)	PE	-36.1402		-91.3946			2-Methylnicotinamide	Pyridines and derivatives	-73.7418				Adenine	Purines and purine derivatives	135.886	-77.5236
DL-Isoleucine	Amino acids and derivatives	102.725		-85.3398			GlcCer(d18:1/24:0)	Cer	-35.8642					PE(20:0/22:1)	PE	-28.2238		-91.6345			5'-Methylthioadenosine	Nucleosides	53.2757	-91.4483			PI(16:0/20:4)	PI	29.2879
(R)-3-Hydroxybutyric acid	Organic acids	-42.866	-64.8875				PC(22:1/20:2)	PC	-44.5868					PE(16:0/14:0)	PE	-37.0919		-74.0243			N2,N2-Dimethylguanosine	Purines and purine derivatives	-41.1197	-76.4419			3-Sulfinoalanine	Amino acids and analogues	93.4368	-87.8465
N-methylalanine	Amino acids and derivatives	71.0448		-97.5598			PC(22:6/21:0)	PC	-54.7991					PE(18:2/18:2)	PE	-23.5759	-40.6924	-80.5696			SM(d16:1/20:1)	SM	69.162				CPA(18:1)	PA	-65.1287	-90.956
Desmosterol	Steroids and steroid derivatives	76.0358	141.729		78.3717		PC(14:0/14:0)	PC	-60.6264		-93.1671			PC(16:0/14:0)	PC	-27.0182					Guanosine	Purines and purine derivatives	174.003	-70.0757			myo-Inositol	Sugar alcohols	87.731	-86.7939
D-sorbitol (sugar alcohol)	Carbohydrates	-87.1209	258.389				PC(20:4/21:0)	PC	-40.3406					PE(P-18:0/20:5)	PE	-41.2455					PC(O-16:0/6:0)	PC	79.6786				SM(d16:1/18:1)	SM	46.8293
1-methyl nicotinamide	Pyridines and derivatives	39.6674		-97.8134			PC(20:5/20:1)	PC	-29.9634		-89.9844			SM(d18:1/26:1)	SM	-23.6675		-64.8182			3-hydroxyoctadecanoylcarnitine	Acylcarnitines	-66.5092				PE(O-18:1/0:0)	PE	70.2041
Myo-Inositol	Carbohydrates	27.71	34.1681	-76.4359			Cer(d18:0/24:0)	Cer	-51.6857					PE-NMe(13M5/11D3)	PE	-18.7953					2-Hydroxyhexadecanoylcarnitine	Acylcarnitines	-52.248				PE(18:0/0:0)	PE	75.9383	274.18
L-Tyrosine	Amino acids and derivatives	42.063					Glucosylceramide (d18:1/22:0)	Cer	-36.0946		-64.4897			PE(P-18:0/18:4)	PE	29.0138					PC(22:4/0:0)	PC	-47.5565	424.11	141.123		CPA(16:0)	PA	-39.5046	361.246
Guanosine	Purines and purine derivatives	123.918		-99.9266			PC(10:0/20:0)	PC	-34.6321					PE(P-18:0/20:1)	PE	-30.3878		-83.0222			-3-hydroxyoctadecenoylcarnitine	Acylcarnitines	-48.6355				PC(0:0/18:1)	PC	-55.857	414.314
l-Leucine, N-methyl-N-(2-methoxyethoxycarbonyl)-, tetradecyl ester	Unknown	61.4202	166.991				PC(20:5/16:1)	PC	-39.3994					PC(14:0/18:1)	PC	-23.0668		-72.9444			3-hydroxytetradecanoylcarnitine	Acylcarnitines	-43.0771	-83.0244			Hypoxanthine	Purines and purine derivatives	-23.5377	-70.0942
L-Serine	Amino acids and derivatives	85.7247		-83.1961			TG(14:0/16:0/22:0)	TG	-43.1857		-71.4911			PC(18:0/18:2)	PC	15.2699					PC(O-16:1/2:0)	PC	-50.8287				PC(O-16:0/2:0)	PC	43.1882	1197.05
alpha-Tocopherol	Prenol lipids	77.5002					PC(O-14:0/16:0)	PC	-37.418		-72.3191			PC(P-18:0/16:1)	PC	-20.9127					Propionyl-L-carnitine	Acylcarnitines		-96.895	-24.6154		Oxoglutaric acid	Organic acids (keto acids)	218.458	-94.5463
Xanthosine	Purines and purine derivatives	124.524	-68.5034	-99.3338			SM(d18:0/14:0)	SM	-23.0951					PE(18:1/14:1)	PE	-28.9478		-86.3096			Nicotinamide	Pyridines and derivatives		-80.6727			PC(20:4/0:0)	PC	-49.6789	643.118
Uric acid	Purines and purine derivatives	243.338	-48.9084				SM(d18:1/26:1)	SM	-31.4659		-79.1176			PE(20:5/20:3)	PE	23.3316					Tiglylcarnitine	Acylcarnitines		-95.6407			PE(20:4/0:0)	PE	-39.3261
Hypoxanthine	Purines and purine derivatives	121.364		-94.6841			Cer(d16:1/17:0)	Cer	67.65					PS(20:3/18:0)	PS		-28.9724	-71.2164			Succinylcarnitine	Acylcarnitines		-99.2884			PC(18:2/0:0)	PC	-41.8437	2451.25
Orotic acid	Pyrimidines and pyrimidine derivatives		-56.6182	-90.3249			Cer(m18:1/24:0)	Cer	-41.5188					SM(d18:1/18:1)	SM		99.2414				DL-Isoleucine	Carboxylic acids		-90.6673			PC(0:0/16:0)	PC	-28.4601	1741.59
L-Threonic acid	Carbohydrates		74.1582				PE(18:2/18:2)	PE	-28.7629		-64.8151			PE(22:4/0:0)	PE		-58.8383				Alanyl-Proline	Peptides		-97.9957			PG(18:1/18:1)	PG		-92.4848
Uracil	Pyrimidines and pyrimidine derivatives		-58.6198	-79.1026			Cer(d18:1/22:0)	Cer	-29.8575	-42.9313	-88.18			PE-NMe(11M3/9M5)	PE		-20.8374				PC(16:1/14:0)	PC		-88.3961	-26.0145		PG(18:0/16:1)	PG		-91.6789
HEXOSE	Carbohydrates		21.944				PC(22:1/20:3)	PC	-37.8322					PC(22:0/18:4)	PC		-23.4326				L-argininium(1+)	Carboxylic acids		-91.8967			Guanosine	Purines and purine derivatives		-83.1717
TRISACCHARIDES	Carbohydrates		115.011	-80.0537			TG(16:0/i-16:0/18:0)	TG	-49.8364		-63.9434			PE(22:1/22:2)	PE		-67.8695	-78.2596			O-butanoyl-carnitine	Acylcarnitines		-90.4989			PS(15:0/20:0)	PS		-71.6468
Dehydroascorbic acid	Lactones		45.3139	-95.406			PE(17:1/17:0)	PE	-34.1569					OHHdiA-PE	PE		-53.451	247.519			Valerylcarnitine	Acylcarnitines		-97.7037			Xanthosine	Purines and purine derivatives		-99.0513
Isothiourea, 2-methyl-1-(2,4-dimethylphenyl)-3-(1,1-dimethyl-2-propynyl)-	Unknown		43.4549	-93.0763			TG(18:0/18:0/18:0)	TG	-58.9823		-80.9678			PC(0:0/18:1)	PC		-55.7843	352.748			(S)-3,4-Dihydroxybutyric acid	Hydroxy acids		-90.0782			D-Pantothenate	Secondary alcohols		-81.4562
Succinic acid	Organic acids		43.9161				TG(16:0/18:0/o-18:0)	TG	-54.6908					Cer(d18:1/24:0)	Cer		-62.1419				Methylguanine	Purines and purine derivatives		-75.6641			PG(16:0/18:2)	PG		-79.1165
allo-inositol	Carbohydrates		26.7111	-92.8615			DG(19:1/19:1/0:0)	DG	-51.2255					PE(22:6/18:2)	PE		-35.5266	-62.5353			PC(14:0/18:1)	PC		-77.5346			SM(d18:1/14:0)	SM		-73.1133
Arachidonic acid	Fatty acyls		-40.1509				PE(22:1/18:3)	PE	-32.115					Cer(d18:1/22:0)	Cer		-43.3101	-83.2666			L-Acetylcarnitine	Acylcarnitines		-85.9733			D-Arabitol/ sugar alcohol	Sugar alcohols		-83.1475
N-acetyl-L-aspartic acid	Amino acids and derivatives		61.9664	-91.4287			SM(d18:1/24:0)	SM	-48.6723					PE(20:1/14:0)	PE		-27.5171				Butenylcarnitine	Acylcarnitines		-91.8726			PG(18:1/18:3)	PG		-74.1912
Linoleic acid	Fatty acyls		-37.4332				PC(20:5/22:4)	PC	-27.2331		-82.0453			PC(0:0/20:4)	PC		-57.3961				SM(d16:1/16:0)	SM		-78.7714			CPA(18:2/0:0)	PA		-74.5265
Malonic acid	Organic acids		-56.1593				PC(11:0/22:0)	PC	-33.1004					Arachidonic acid	Fatty acyls		-55.0383	434.923			Hydroxyisovaleroylcarnitine	Acylcarnitines		-94.8621	-22.7547		PC(18:0/20:3)	PC		-73.4273
Uridine	Pyrimidines and pyrimidine derivatives		-33.571	-97.3436			TG(15:0/o-18:0/15:0)	TG	-42.5557					Stearic acid	Fatty acyls		-47.2743				m-Aminobenzoic acid	Benzoic acids		-92.4807			PE(P-18:0/18:4)	PE		-91.2149
Adenine	Purines and purine derivatives		52.7171				SM(d18:0/16:0)	SM	-25.5965					PS(22:6/21:0)	PS		-34.9656	200.713			PC(15:0/18:1)	PC		-73.0865			Adenosine	Purines and purine derivatives		-77.4278
Xanthine	Purines and purine derivatives		-63.1663	-90.5332			PE(22:1/20:3)	PE	-35.7895					PE(22:6/21:0)	PE		-29.3352				D-Pantothenate	Alcohols and polyols		-85.8717			PE(P-16:0/22:6)	PE		-93.6277
Oleic acid	Fatty acyls		-30.3452				TG(15:0/i-16:0/a-25:0)[rac]	TG	-64.3165					Cer(t26:1/16:0(2OH[R]))	Cer		-36.206				Lauroyl diethanolamide	Fatty acyls		-63.4769
D-Malic acid	Organic acids		-22.9274	-83.4888			PE(P-18:0/22:6)	PE	-23.1758		-94.0563			PE(22:6/0:0)	PE		-47.7475				PC(16:1/18:0)	PC		-75.7338
Inosine	Purines and purine derivatives			-95.3148			SM(d18:1/12:0)	SM	-30.9838					Cer(d18:1/14:0)	Cer		-53.5684	-94.0807			PC(14:0/16:0)	PC		-66.31
Adenosine	Purines and purine derivatives			-99.8402			PC(22:1/20:1)	PC	-33.9757					PS(17:1/22:1)	PS		25.1875				PC(14:0/14:0)	PC		-86.928	-23.9126
Cytosine	Pyrimidines and pyrimidine derivatives			-94.1133			PC(20:5/18:0)	PC	66.3386		-94.7958			Cer(d18:1/16:0)	Cer		-40.5399	-70.8649			8-Aminooctanoic acid	Fatty acids		-94.5415
Glycine	Amino acids and derivatives			-88.9956			PE(20:3/20:3)	PE	-28.8299		-85.7911			Cer(d15:1/24:0)	Cer		-44.3765	-73.8093			Xanthosine	Purines and purine derivatives		-98.6108	79.5742
Glucuronic acid	Carbohydrates			-93.226			PE(18:0/14:0)	PE	-24.7555					PE(18:1/0:0)	PE		-43.565				Hydroxyhexanoycarnitine	Acylcarnitines		-72.9513
L-5-Oxoproline	Amino acids and derivatives			-88.8487			TG(12:0/16:0/16:0)	TG	-27.6385					PE(20:3/0:0)	PE		-41.9319	-80.1809			Adenosine	Purines and purine derivatives		-88.0615
Xylitol SUGAR ALCOHOL C5H12O5	Carbohydrates			-82.6117			DG(18:2/22:4/0:0)	DG	-24.4137		-87.1942			PC(18:2/0:0)	PC		-43.4443	1551.58			PC(20:3/16:0)	PC		-71.5232
L-Valine	Amino acids and derivatives			-80.3162	18.863		SM(d18:1/24:1)	SM	-22.5112		-81.4478			PS(20:1/22:0)	PS		-57.5374	-87.4157			L-4-Hydroxyglutamate semialdehyde	Amino acids and derivatives		-72.4273
L-Aspartic acid	Amino acids and derivatives			-97.2425			PC(20:0/20:1)	PC	-32.9366		-67.9541			PE(22:2/18:4)	PE		-34.1548	-61.1206			Creatinine	Amino acids and derivatives		-68.2314
Pantothenic acid	Alcohols and polyols			-89.68			PC(16:0/22:2)	PC	-32.0245		-95.0047			PS(22:6/0:0)	PS		-33.3641				3-Dehydroxycarnitine	Acylcarnitines		-95.4345
Hypotaurine	Organic acids			-87.1945			PC(18:3/21:0)	PC	-34.8024		-90.6972			Linoleic acid	Fatty acyls		-38.9568				L-carnitine	Acylcarnitines		-89.2986
Ascorbic acid	Organoheterocyclic compounds			-97.5477			TG(16:0/18:0/20:0)	TG	-51.7489					Cer(d18:2/20:0)	Cer			-89.6449			Cytidine	Pyrimidines and pyrimidine derivatives		-90.9092
L-Asparagine	Amino acids and derivatives			-99.4313			PE(16:1/22:0)	PE	-29.8119		-90.6322			Cer(d18:1/18:0)	Cer			-92.3979			Asparaginyl-Valine	Peptides		-75.0117
Cytindine-5'-monophosphate 2	Nucleotide			-96.5662			GlcCer(d16:1/20:0)	Cer	-30.7783					PE(18:0/22:1)	PE			-92.1408			Inosine	Purine nucleosides		-83.9998
L-Proline	Amino acids and derivatives			-96.1364			PC(20:3/22:1)	PC	-29.6044					PC(16:0/0:0)	PC			1290.6			PC(20:3/0:0)	PC		-89.7966
L-Ornithine	Amino acids and derivatives			-76.6632	37.2603		PC(20:3/18:2)	PC	-38.1455					PE(20:2/14:1)	PE			-88.5796			L-α-Glycerylphosphorylcholine	PC		-84.9404
PENTOSE	Carbohydrates			-86.5088			SM(d18:0/24:1)	SM	-21.3035		-85.6107			PS(20:1/20:0)	PS			-89.322			PC(18:2/18:0)	PC		-66.3445
L-Glutamic acid	Amino acids and derivatives			-93.8291			LacCer(d18:1/24:0)	Cer	-32.1741	-58.5311				PC(O-16:0/2:0)	PC			849.329			Hexanoyl-L-carnitine	Acylcarnitines		-68.7175
L-Threonine	Amino acids and derivatives			-92.3019			LacCer(d18:1/24:1)	Cer	-36.3304					PE(22:2/14:1)	PE			-87.9286			PC(16:0/11:0(COH))	PC		-80.6106
Creatinine	Amino acids and derivatives			-89.9096			Cer(d18:0/22:0)	Cer	-48.8801	-80.1663				PE(20:0/14:1)	PE			-88.6245			PC(16:0/0:0)	PC		968.103
Fumaric acid	Organic acids			-91.5894			PE(20:1/16:0)	PE	-24.1166		-98.5095			PC(20:4/0:0)	PC			667.253			N-Acetyl-D-glucosamine	Carbohydrates		-56.8067
5-hydroxy-L-tryptophan	Amino acids and derivatives			-98.439			PE(22:6/16:0)	PE	-23.5497		-75.8899			SM(d16:1/16:0)	SM			-86.4531			Riboflavin	Pteridines and derivatives			53.1579
Thymine	Pyrimidines and pyrimidine derivatives			-85.6624	26.6313		PS(18:0/22:2)	PS	-26.2953					Cer(m18:1/20:0)	Cer			-88.3251
L-Lysine	Amino acids and derivatives				71.1842		SM(d18:1/22:0)	SM	-20.1903		-92.697			Cer(d18:1/26:1)	Cer			-86.4249
Pyroglutamic acid	Amino acids and derivatives				-37.5895		DG(a-15:0/0:0/17:0)	DG	-21.1204		-70.7202			PE(P-16:0/16:0)	PE			-82.405
2-amino-1-phenylethanol	Amino acids and derivatives				38.7829		PC(O-16:0/16:1)	PC	-21.8366					PE(20:0/16:1)	PE			-84.2016
							Lactosylceramide (d18:1/22:0)	Cer	-34.7214		-68.2664			Cer(d18:0/24:1)	Cer			-86.5488
							Tetradecanoylcarnitine	Acylcarnitines	-45.8679					SM(d18:1/12:0)	SM			619.15
							PS(20:1/22:1)	PS	-27.011	-61.8897	-95.8536			Cer(t26:1/10:0(2OH[R]))	Cer			-82.6201
							TG(16:0/16:0/20:0)	TG	-43.084		-86.9169			Cer(d18:1/18:1)	Cer			-75.6958
							PE-Cer(d14:1/20:0)	Cer	-23.9563					PE(20:0/14:0)	PE			-79.6273
							PC(22:1/20:0)	PC	-29.3386					Adrenic Acid	Fatty acyls			838.786
							Cer(d18:0/16:0)	Cer		-61.6999				PS(22:4/18:2)	PS			-84.2016
							SM(d18:1/18:1)	SM		99.8309				PE(22:2/14:0)	PE			-79.2007
							PC(22:4/0:0)	PC		-57.9096				PE(MonoMe(11,5)/DiMe(9,3))	PE			-77.3993
							PC(O-16:0/2:0)	PC		73.802				PE(18:2/18:2)[U]	PE			-78.2462
							Cer(d18:1/24:1)	Cer		-57.5636				PE(20:1/14:1)	PE			-77.879
							PC(O-16:0/3:0)	PC		76.2656				PE(P-18:0/16:1)	PE			-77.4059
							PC(20:0/0:0)	PC		66.4479				PE(18:0/14:0)	PE			-77.1022
							SM(d16:1/18:1)	SM		67.6531				PE(16:0/0:0)	PE			353.654
							Cer(d14:1/20:0)	Cer		-51.9294				PC(14:0/16:0)	PC			-77.7654
							DG(18:4/22:1/0:0)	DG		-53.5852				PE(P-18:0/18:1)	PE			-73.1233
							Cer(d18:1/23:0)	Cer		-39.7293				PS(20:1/17:2)	PS			-72.8586
							PC(0:0/18:1)	PC		-54.8174				PS(19:0/22:6)	PS			-75.2888
							PE(P-16:0/20:3)	PE		63.7006				N-Lignoceroylsphingosine	Cer			-75.5121
							Cer(d18:1/18:0)	Cer		-38.1796				SM(d16:1/20:0)	SM			-69.4417
							Cer(d18:1/24:0)	Cer		-52.574				PE(20:2/18:4)	PE			-73.6806
							PC(22:6/0:0)	PC		-52.3292				PC(18:0/20:3)	PC			-67.3678
							PC(20:4/0:0)	PC		-56.3273				PE(22:6/16:0)	PE			-67.0759
							DG(18:4/21:0/0:0)	DG		-50.3206				PE(P-18:0/22:4)	PE			-66.3186
							PC(22:0/22:4)	PC		-60.462				PE(P-16:0/18:2)	PE			-68.4992
							Cer(d18:2/23:0)	Cer		-46.7965				Cer(d18:1/24:1)	Cer			-70.6256
							PC(17:0/0:0)	PC		40.0333				PC(19:1/17:2)	PC			-63.9014
							Cer(d18:1/18:1)	Cer		-29.3507				PC(18:2/18:2)	PC			162.528
							PC(18:2/0:0)	PC		-40.2531				PE(P-18:0/22:6)	PE			-66.363
							Cer(d18:2/16:0)	Cer		-37.6336				PE(16:1/22:4)	PE			-61.9966
							Cer(d18:1/17:0)	Cer		-43.0486				PC(18:0/18:1)	PC			-59.4875
							DG(18:1/20:0/0:0)	DG		-39.3443				PE(22:4/18:3)	PE			-60.6299
							2-oxo-nonadecanoic acid	Fatty acyls			-73.4483			PE(16:1/22:2)	PE			-60.0766
							Cholesterol	Sterol lipids			788.809			LysoPC(20:3)	PC			158.238
							14alpha-methyl-5alpha-cholest-9(11)-en-3beta-ol	Sterol lipids			1408.76			PE(20:4/22:0)	PE			-59.6735
							Stearoylcarnitine	Acylcarnitines			-78.8152			SM(d16:1/17:0)	SM			138.74
							PC(16:0/0:0)	PC			1933.47			PC(18:0/20:4)	PC			-58.4397
							PC(17:0/0:0)	PC			1357.7
							Cer(d18:1/14:0)	Cer			-97.0253
							PC(18:2/0:0)	PC			2575.26
							PC(18:1/0:0)	PC			519.314
							PC(O-16:0/2:0)	PC			1108.05
							PC(O-16:0/3:0)	PC			861.16
							Cer(d14:1/20:0)	Cer			-85.9776
							PC(20:4/0:0)	PC			978.914
							PC(20:0/0:0)	PC			496.197
							Cer(d18:1/17:0)	Cer			-86.4177
							Cer(d18:1/18:0)	Cer			-92.1203
							PC(22:6/0:0)	PC			863.115
							Cer(d18:1/20:0)	Cer			-95.5843
							16:3 Cholesteryl ester	Sterol lipids			424.466
							Cer(d18:2/23:0)	Cer			-68.8158
							DG(15:1/22:3/0:0)	DG			-75.6355
							Cer(d18:1/24:1)	Cer			-89.5391
							Cer(d18:1/24:0)	Cer			-81.7189
							DG(15:0/22:4/0:0)	DG			-78.4937
							18:3 Cholesteryl ester	Sterol lipids			1589.78
							18:3 Cholesteryl ester	Sterol lipids			1199.22
							20:5 Cholesteryl ester	Sterol lipids			1018.57
							DG(18:1/20:0/0:0)	DG			-82.0093
							SM(d16:1/16:0)	SM			-80.6244
							PE(O-18:0/14:1)	PE			-92.2142
							Cer(d18:1/26:1)	Cer			-80.2614
							DG(18:3/21:0/0:0)	DG			-82.3693
							PE(20:0/12:0)	PE			-90.8971
							PC(15:0/14:0)	PC			-82.6921
							DG(18:4/22:1/0:0)	DG			-88.8482
							22:6 Cholesteryl ester	Sterol lipids			567.345
							PE(P-18:0/16:1)	PE			-97.4957
							PC(11:0/19:0)	PC			-88.1202
							DG(18:3/22:3/0:0)	DG			-70.1264
							DG(18:4/22:1/0:0)	DG			-78.2158
							PE(18:1/16:1)	PE			-87.5966
							SM(d18:1/17:0)	SM			-85.6181
							PE(17:0/17:1)	PE			-97.8938
							PE(O-16:0/19:1)	PE			-85.1575
							PC(16:0/15:0)	PC			-95.2471
							PE(14:0/20:0)	PE			-67.9186
							PE(P-16:0/20:3)	PE			-96.6206
							22:3 Stigmasteryl ester	Sterol lipids			1124.97
							SM(d18:1/18:0)	SM			-87.0806
							PE(20:1/15:0)	PE			-88.4826
							PE(18:0/18:3)	PE			-97.504
							PE(19:1/17:1)	PE			-93.7171
							PC(20:1/13:0)	PC			-85.5731
							PE(P-16:0/22:6)	PE			-80.2056
							PC(18:0/15:0)	PC			-87.4824
							PC(O-16:0/18:0)	PC			-89.3974
							PE(P-16:0/22:4)	PE			-83.8417
							PE(P-18:0/20:4)	PE			-87.8801
							SM(d18:2/20:0)	SM			-86.0875
							SM(d18:1/20:0)	SM			-95.0105
							PC(16:1/18:0)	PC			-78.1671
							PC(16:0/18:0)	PC			-86.2681
							PE(16:1/22:4)	PE			-92.3013
							PE(18:0/20:4)	PE			-75.7677
							PE(16:1/22:2)	PE			-96.5891
							PC(15:0/20:2)	PC			-80.5781
							PE(P-18:1/22:6)	PE			-86.6448
							PC(16:1/20:5)	PC			-82.5835
							PE(O-20:0/20:5)	PE			-92.0833
							PC(20:3/16:1)	PC			-82.3539
							PE(P-18:0/20:0)	PE			-86.9377
							PC(20:3/16:0)	PC			-85.2177
							PC(18:0/18:2)	PC			-73.6724
							PC(22:1/14:0)	PC			-93.7125
							SM(d18:0/22:0)	SM			-74.2082
							PE(22:4/18:3)	PE			-84.5805
							PE(22:4/18:1)	PE			-74.4265
							PE(22:2/18:2)	PE			-93.7867
							PC(18:3/19:1)	PC			-93.4246
							TG(14:0/16:0/16:0)	TG			-74.9357
							PC(21:0/16:1)	PC			-85.1765
							PC(20:5/18:2)	PC			-67.7424
							PC(20:3/18:1)	PC			-87.3191
							SM(d18:2/24:1)	SM			-83.6694
							PC(18:3/20:0)	PC			-95.1863
							PS(20:1/18:2)	PS			-95.131
							PE(22:4/20:0)	PE			-86.6788
							PC(22:6/18:4)	PC			-70.1849
							PC(18:2/22:5)	PC			-79.143
							PS(22:4/18:2)	PS			-78.1964
							PS(18:4/22:1)	PS			-77.2691
							PE-NMe2(11M3/9D5)	PE			-90.7935
							PC(18:4/22:0)	PC			-83.8512
							PS(22:4/18:0)	PS			-84.0958
							PC(20:3/20:0)	PC			-87.8794
							PC(22:0/18:1)	PC			-74.766
							Coenzyme Q10	Prenol lipids			283.68
							PC(22:0/20:3)	PC			-71.2593
							PI(16:0/20:2)	PI			-72.47
							PC(22:1/22:6)	PC			-74.2287
							PI(18:0/20:3)	PI			-86.3743
							(3'-sulfo)Galbeta-Cer(d18:1/24:1)	Cer			-75.6631
							PS(22:1/22:2)	PS			-89.3918
							TG(14:1/18:1/22:0)	TG			-68.8574
							TG(16:0/16:0/22:1)	TG			-89.5171
							TG(15:0/24:0/15:0)	TG			-71.7316
							PI(20:0/18:1)	PI			-71.8912
							TG(17:1/19:1/20:2)	TG			-75.3259
							TG(17:1/19:1/20:1)	TG			-74.653
							TG(16:1/18:1/22:0)	TG			-71.8353
							TG(14:0/20:1/22:0)	TG			-80.0564
							TG(18:3/18:4/22:2)	TG			-79.3885
							TG(18:2/18:3/22:1)	TG			-80.4144
							TG(18:2/20:1/20:1)	TG			-76.3077
							TG(17:1/19:0/22:1)	TG			-70.0388
							TG(18:3/20:3/22:1)	TG			-76.291
							TG(20:4/20:5/22:3)	TG			-77.9765
							DG(15:0/0:0/15:0)	DG				95.7592
							DG(15:0/20:2/0:0)	DG				34.8837
